# Supplementary material
Source: PubMed Central journal article supplement (PMC3056570)
Supplement: NIHMS265856-supplement-1.pdf [file NIHMS265856-supplement-1.pdf]

## Supplemental Figure 1

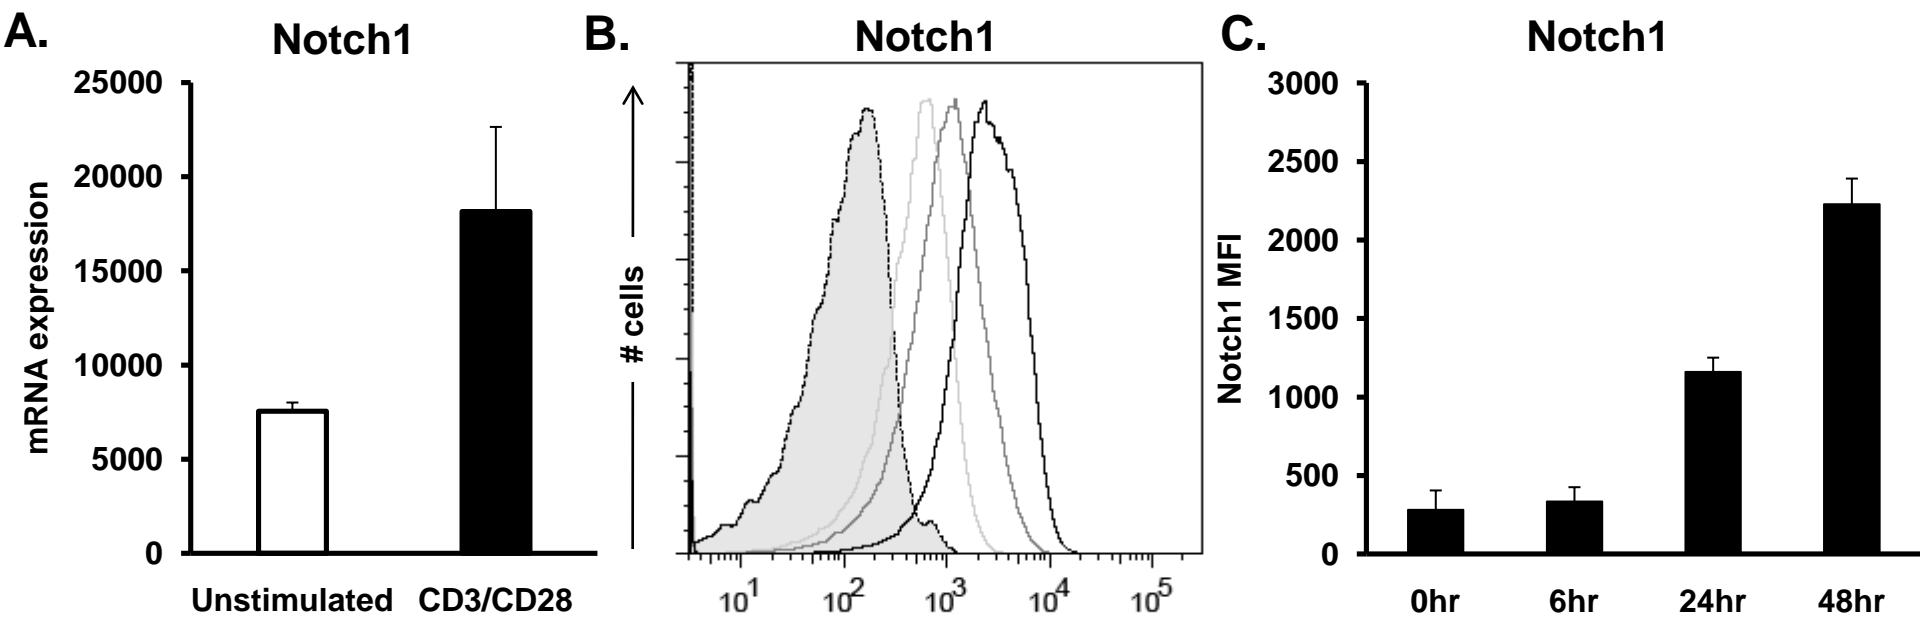

**Supplemental Figure 1. T cell activation enhances Notch1 surface expression.** **A.** CD4 T cells purified from PBMC of healthy donors were stimulated with immobilized anti-CD3/CD28 mAbs. The cells were harvested at 24 h and Notch1 expression was analyzed by real time PCR. **B.** Alternatively, cell surface expression of the Notch1 receptor was quantified by flow cytometry on CD4 T cells stimulated with anti-CD3/CD28 (1 $\mu$ g/ml) for 0 (light grey line), 24 (dark grey line) or 48 h (black line). Shaded histogram represents isotype control. Representative data from one of six independent experiments are shown. **C.** Cell surface expression of Notch 1 on CD4 T cells was measured as mean fluorescence intensity 0, 6, 24, or 48 h post stimulation. Data shown are the means  $\pm$  SEM from 6 independent experiments.

# Supplemental Figure 2

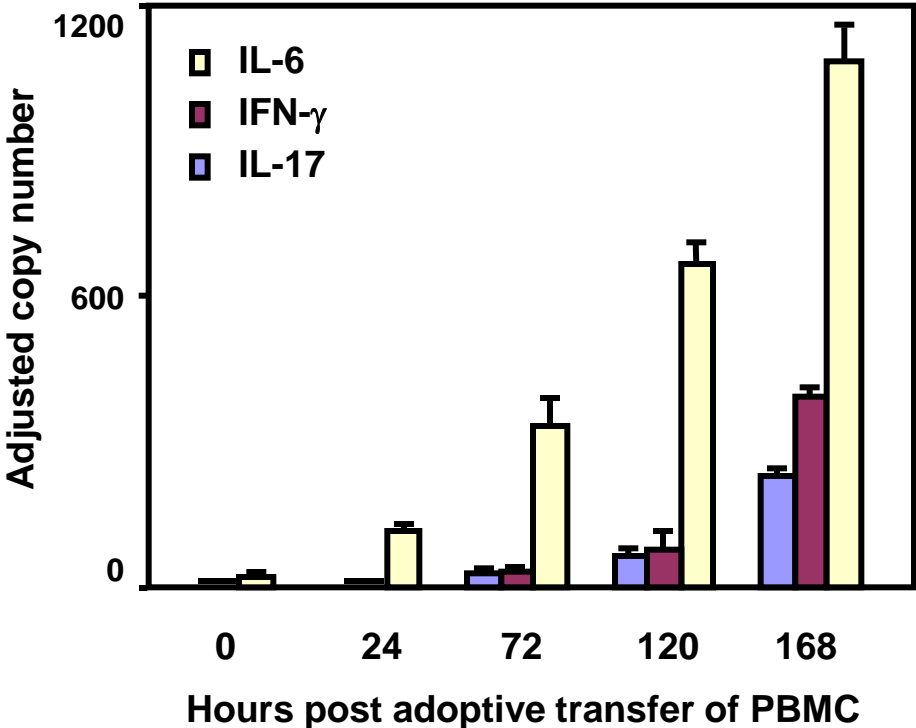

**Supplemental Figure 2. Time course of vascular inflammation in the humanized mouse**

**model** . Axillary arteries were implanted into SCID mice. On day 7, chimeras were injected with LPS (3 $\mu$ g/mouse). Twenty-four hours later, PBMC (3 $\times$ 10<sup>7</sup>/mouse) from healthy donors were adoptively transferred into chimeras by intravenous injection. Arterial tissues were explanted at different time points (0, 24, 72, 120, 168 hours after adaptive transfer).

Transcripts for the inflammatory cytokine IL-6, the Th1 T cell cytokine IFN- $\gamma$  and the Th17 T cell cytokine IL-17 in the tissue extracts were quantified by RT-PCR. Results are shown as mean  $\pm$  SEM. from three independent experiments.

# Supplemental Figure 3

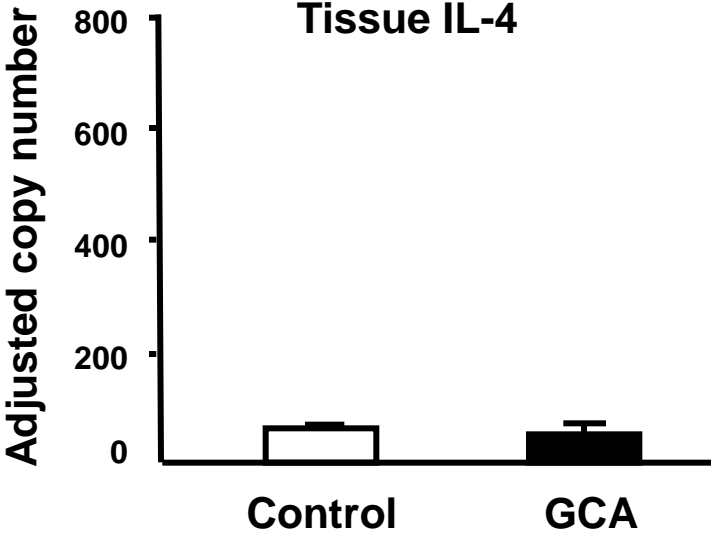

**Supplemental Figure 3. Th2 responses in GCA.** RNA was isolated from temporal artery biopsies, which either had no evidence for inflammation (control) or showed granulomatous infiltrates typical of GCA (GCA) (n=4). Transcript expression levels of the Th2 cytokine IL-4 were quantified by RT-PCR. Data shown are the mean  $\pm$  SEM.

## Supplemental Table 1. Human primer pairs for qRT-PCR

| Gene           | Sense                           | Antisense                         |
|----------------|---------------------------------|-----------------------------------|
| $\beta$ -actin | 5-ATGGCCACGGCTGCTTCCAGC-3       | 5-CATGGTGGTGCCGCCAGACAG-3         |
| IFN- $\gamma$  | 5-ACCTTAAGAAATATTTTAATGC-3      | 5-ACCGAATAATTAGTCAGCTT-3          |
| IL-17          | 5-AGGCCATAGTGAAGGCAGGAATCA-3    | 5-ATTCCAAGGTGAGGTGGATCGGTT-3      |
| TCR            | 5-CCTTCAACAACAGCATTATTATTCCAG-3 | 5-CGAGGGAGCACAGGCTGTCTTA-3        |
| CCR6           | 5-GGCGACTAAGTCATTCCG-3          | 5-CTCCGAGACAGTCTGGTAC-3           |
| Smoothelin     | 5-TTGGACAAGATGCTGGATCA-3        | 5-CGCTGGTCTCTCTTCCTTTG-3          |
| Notch1         | 5'GGTCAATGCGAGTGGC-3            | 5'GGCAGCAAGGCTACTGTG-3            |
| Jagged-1       | 5-GCTGCCTTTCAGTTTCGCCTGG-3      | 5-GCAGAACTTATTGCAGCCAAAGCC-3      |
| Hes-1          | 5-TGG GTG CCA AGC ACT GC-3      | 5-TCG TGA CCA CCT TGT TTT TCT G-3 |
| Delta1         | 5-TGTCTTATGGCACTGTCCGGGATT-3    | 5-TTCTGAAGGACTGGACACGCAGTT-3      |
| Delta4         | 5-TGCAACAAGGTTACCGCCACATTC-3    | 5-TGAAATGCCCACCTCAGGACTCAT-3      |
| IL-4           | 5-TACAGCCACCATGAGAAGGACACT-3    | 5-TTCCTGTGCGAGCCGTTTCAGGAAT-3     |
| TGF- $\beta$   | 5-TGAGAGACCTGCTGAACAACCACA-3    | 5-ATTGGAGATGATCGCCTTCCCGTT-3      |
| IL-6           | 5-AGCCACTCACCTCTTCAGAACGAA-3    | 5-AGTGCCTCTTTGCTGCTTTCACAC-3      |
